# Supplementary material
Source: MDPI journal article supplement (https://www.mdpi.com/2571-9637/5/2/22)
Supplement: s1 [file s1]

# Supplementary Materials: Surfactants for Electrophoretic Deposition of Polyvinylidene Fluoride–Silica Composites

Zhengzheng Wang and Igor Zhitomirsky \*

Department of Materials Science and Engineering, McMaster University, Hamilton, ON L8S4L7, Canada; wangz338@mcmaster.ca (Z.W.); zhitom@mcmaster.ca (I.Z.)

\* Correspondence: zhitom@mcmaster.ca (I.Z.)

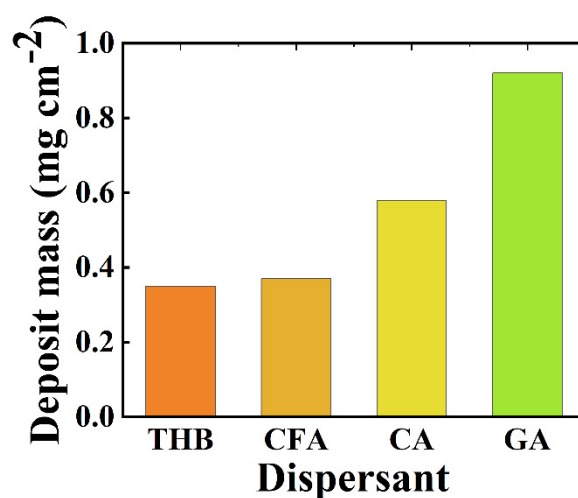

**Figure S1.** Deposit mass achieved for different dispersants using 5 g L<sup>-1</sup> PVDF suspensions containing 1 g L<sup>-1</sup> dispersants for deposition time of 5 min and deposition voltage of 50V.

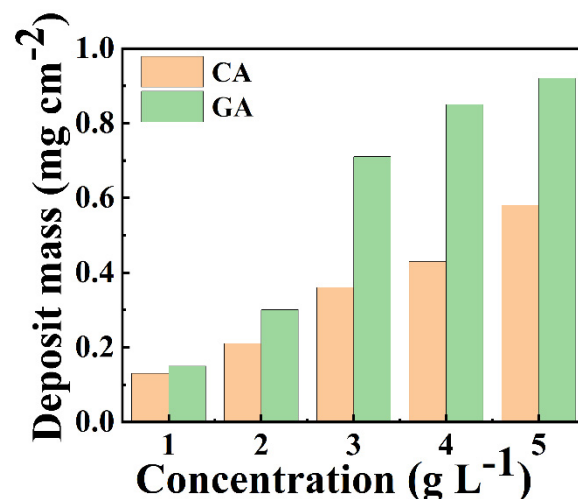

**Figure S2.** Deposit mass versus PVDF concentration in suspensions, containing 1 g L<sup>-1</sup> dispersants for deposition time of 5 min and deposition voltage of 50V.

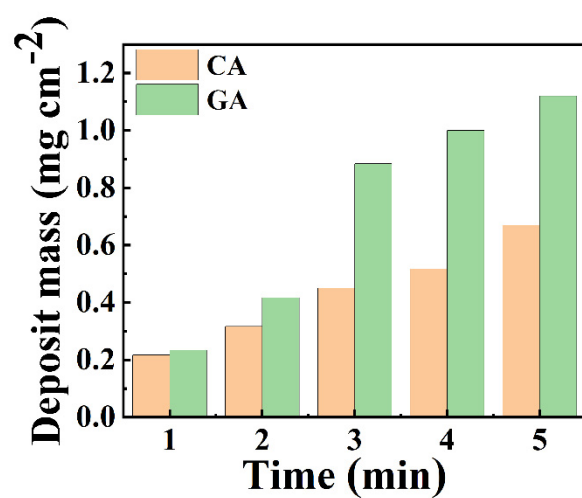

Figure S3. Deposit mass versus deposition time at a deposition voltage of 100 V for 5 g L<sup>-1</sup> PVDF suspensions.

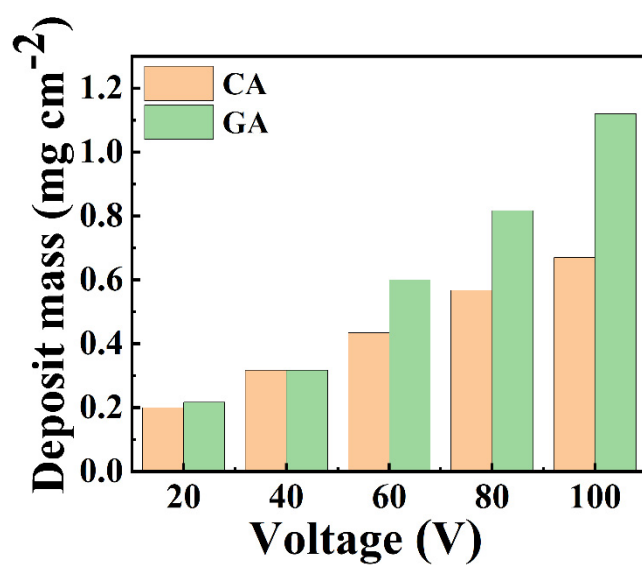

Figure S4. Deposit mass versus deposition voltage for 5 g L<sup>-1</sup> PVDF suspensions at deposition time of 5 min.

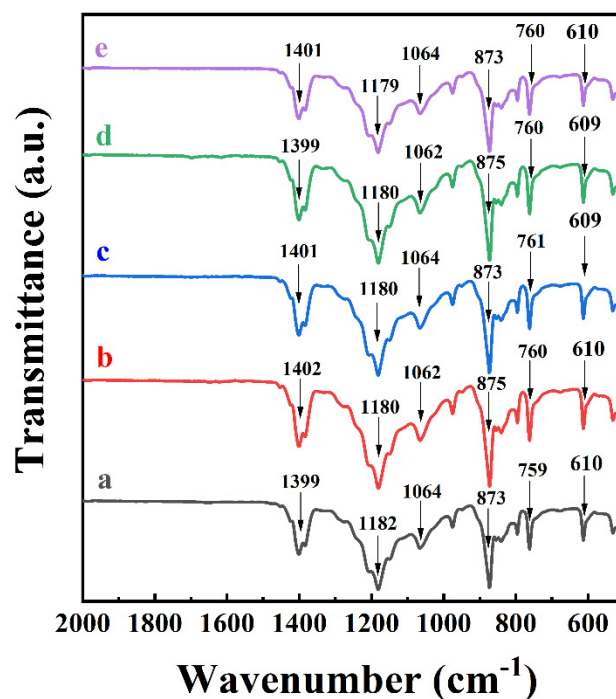

**Figure S5.** FTIR spectra of deposits, prepared from using 5 g L<sup>-1</sup> PVDF suspensions containing 1 g L<sup>-1</sup> dispersants: (a) THB, (b) CFA, (c) CA, (d) GA for deposition time of 5 min and deposition voltage of 100V and (e) as-received PVDF.

The spectra of deposited materials contains peaks similar to the peaks of as-received PVDF. The strong broad absorption at 1401 cm<sup>-1</sup> in the spectrum of as-received PVDF resulted from wagging of CH<sub>2</sub> and antisymmetric stretching of C-C bonds[1]. Other strong bands at 1179 and 873cm<sup>-1</sup> were associated with the stretching and rocking of CF<sub>2</sub> bonds[1, 2].

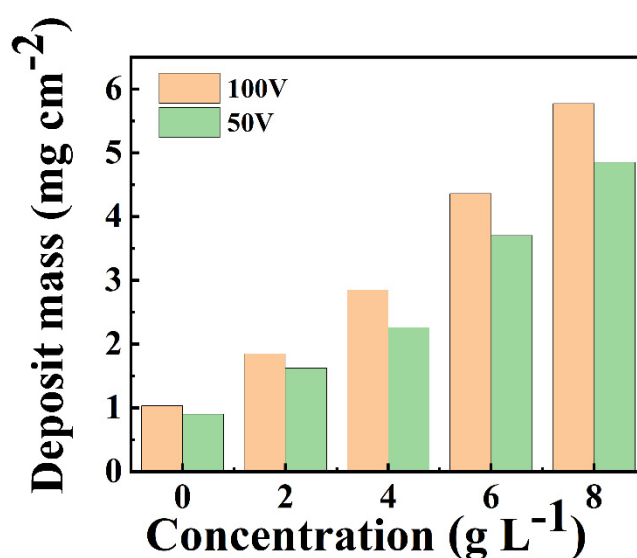

**Figure S6.** Deposit mass versus nanosilica concentration in 5 g L<sup>-1</sup> PVDF suspension containing 2 g L<sup>-1</sup> GA at deposition time of 5 min at voltages of 50 V and 100 V.

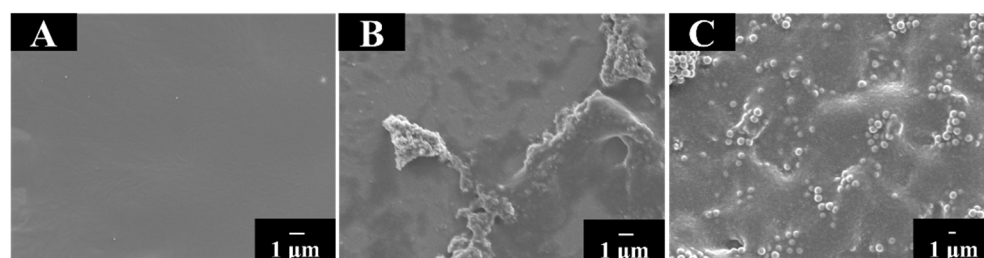

**Figure S7.** SEM images of coatings, prepared from 5 g L<sup>-1</sup> PVDF solution, containing 1 g L<sup>-1</sup> GA (A) without silica, (B) with 1 g L<sup>-1</sup> nanosilica and (C) with 1 g L<sup>-1</sup> micron size silica deposited at a deposition voltage of 100V and deposition time of 5 min and annealed at 200°C for 1 h.

1. Kobayashi, M.; Tashiro, K.; Tadokoro, H. Molecular vibrations of three crystal forms of poly (vinylidene fluoride). *Macromolecules* **1975**, *8*, 158-171.
2. Zeng, Z.; Yu, D.; He, Z.; Liu, J.; Xiao, F.-X.; Zhang, Y.; Wang, R.; Bhattacharyya, D.; Tan, T. T. Y. Graphene oxide quantum dots covalently functionalized PVDF membrane with significantly-enhanced bactericidal and antibiofouling performances. *Scientific reports* **2016**, *6*, 1-11.
